# Supplementary material
Source: PubMed Central journal article supplement (PMC7444092)
Supplement: NIHMS906087-supplement-Long_Loop_Supporting_Docs.pdf [file NIHMS906087-supplement-Long_Loop_Supporting_Docs.pdf]

# Optimization of a $\beta$ -sheet-cap for long loop closure

Jordan M. Anderson, Alexander A. Shcherbakov, Brandon L. Kier, Jackson Kellock, Irene Shu,  
Aimee L. Byrne and Niels H. Andersen\*

*Department of Chemistry, University of Washington, Seattle WA 98195*

## Supporting Information.

All relevant  $^1\text{H}$  NMR data used to produce this manuscript is stored in a publicly accessible Chemical Shift Database (CSDb). In order to access, search for the CSDb ascension number or name at the website: <http://andersenlab.chem.washington.edu/CSDb/>. In addition to acting as a depository for this data, the website contains the algorithm<sup>1-4</sup> used to calculate CSD values and contains a graphical program for comparing histograms of different peptides.

Table 1. Peptide List

| Entry # | System    | Loop Length | Sequence<br><b>cap</b> – $\beta$ -strand – loop – $\beta$ -strand – <b>cap'</b>          | Ref. | CSDb Ascension Name |
|---------|-----------|-------------|------------------------------------------------------------------------------------------|------|---------------------|
| 1       |           | 10          | Ac-WVTI - G <sub>3</sub> GKKGG <sub>3</sub> - KKI <b>WTG</b> -NH <sub>2</sub>            | 603  | GLHP                |
| 2       |           | 10          | Pr-WVCK - G <sub>3</sub> GKKGG <sub>3</sub> -VCK <b>WTGPK</b> -NH <sub>2</sub>           | 703  | Superloop           |
| 3       | B2        | 2           | Ac-WITVTI - GG - KKIRV <b>WTG</b> -NH <sub>2</sub>                                       | 780  | cap@6 GG            |
| 4       | B2        | 4           | Ac-WITVTI - GGGG - KKIRV <b>WTG</b> -NH <sub>2</sub>                                     | 784  | GGGG                |
| 19      | B2        | 6           | Ac-WITVTI-GGGGGG-KKIRV <b>WTG</b> -NH <sub>2</sub>                                       | 870  | Cap @ 6c G6         |
| 5       | B2        | 10          | Ac-WITVTI - G <sub>3</sub> GKKGG <sub>3</sub> - KKIRV <b>WTG</b> -NH <sub>2</sub>        | 739  | cap@6 superloop     |
| 20      | B2        | 6           | Ac-WITVTI-(GI <b>pGKG</b> )-KKIRV <b>WTG</b> -NH <sub>2</sub>                            | 806  | GIpGKG              |
| 22      | B2        | 10          | Ac-WITVTI-(G <sub>3</sub> I <b>pGKG</b> <sub>3</sub> )-KKIRV <b>WTG</b> -NH <sub>2</sub> | 815  | 3G-IpGK             |
| 21      | B2        | 8           | Ac-WITVTI-(GNPAT <b>GKG</b> )-KKIRV <b>WTG</b> -NH <sub>2</sub>                          | 808  | GNPATKG             |
| 6       | B4        | 10          | Ac-WITVRIW-G <sub>3</sub> GKKGG <sub>3</sub> - <b>WKTIRVWTG</b> -NH <sub>2</sub>         | 833  | W4G4K2G4            |
| 7       | B4        | 2/4         | Ac-WITVRIW - SNGK - <b>WKTIRVWTG</b> -NH <sub>2</sub>                                    | 824  | W4SNGK              |
| 8       | C2<br>R1H | 10          | HWITVTI - G <sub>3</sub> GKKGG <sub>3</sub> - KKIRV <b>WE</b>                            | 803  | Superloop HWWE      |
| 9       | C2        | 2           | RWITVTI - GG - KKIRV <b>WE</b>                                                           | 984  | R-GG-E              |
| 10      | C2        | 4           | RWITVTI - GGGG - KKIRV <b>WE</b>                                                         | 901  | RGGGGE              |

|     |    |     |                                                                         |                         |                    |
|-----|----|-----|-------------------------------------------------------------------------|-------------------------|--------------------|
| 23  | C2 | 6   | RWITVTI – GGGGGG - KKIRVWE                                              | 1065                    | R-GGGGGG-E         |
| 11  | C2 | 10  | RWITVTI - (G <sub>3</sub> GKK)GG <sub>3</sub> - KKIRVWE                 | 922                     | R-Superloop-E      |
| 12  | C2 | 16  | RWITVTI - (G <sub>3</sub> GKK) <sub>2</sub> GG <sub>3</sub> - KKIRVWE   | 951                     | R-(GGGGKK)3-E      |
| 13  | C2 | 22  | RWITVTI - (G <sub>3</sub> GKK) <sub>3</sub> GG <sub>3</sub> - KKIRVWE   | 967                     | R-(GGGGKK)4-E      |
| 24  | C2 | 6   | RWITVTI - GIpGKG - KKIRVWE                                              | 1095                    | R-GIpGK-E          |
| 25  | C2 | 6   | RWITVTI - GIPGKG - KKIRVWE                                              | 1109                    | R-GIPGK-E          |
| 26  | C2 | 8   | RWITVTI - GNPATGKG - KKIRVWE                                            | 1112                    | R-GNPATGKG-E       |
| 27  | C2 | 10  | RWITVTI - G <sub>3</sub> IpGKG <sub>3</sub> - KKIRVWE                   | 1094                    | R-G3IpGKG3-E       |
| 28  | C2 | 10  | RWITVTI - G <sub>3</sub> IPGKG <sub>3</sub> - KKIRVWE                   | 1122                    | R-G3IPGKG3-E       |
| 29  | C2 | 16  | RWITVTI - G <sub>6</sub> IpGKG <sub>6</sub> - KKIRVWE                   | 1106                    | R-G6IpGKG6-E       |
| 30  | C2 | 16  | RWITVTI - G <sub>6</sub> IPGKG <sub>6</sub> - KKIRVWE                   | 1127                    | R-G6IPGKG6-E       |
| 31  | C2 | 16  | RWITVTI – G <sub>5</sub> NPATGKG <sub>5</sub> - KKIRVWE                 | 1178                    | R-GNPATGKG5-E      |
| 14  | C4 | 2/4 | RWITVRIW - IGGK - WKTIRVWE                                              | 1364                    | RWW-IGGK           |
| 15  | C4 | 10  | RWITVRIW - G <sub>3</sub> GKKGG <sub>3</sub> - WKTIRVWE                 | 1055                    | RWW-10loop-<br>WWE |
| 16  | C4 | 16  | RWITVRIW - (G <sub>3</sub> GKK) <sub>2</sub> GG <sub>3</sub> - WKTIRVWE | 1156                    | RWW-16Loop-<br>WWE |
| 16Y |    | 16  | RWITVRIY - (G <sub>3</sub> GKK) <sub>2</sub> GG <sub>3</sub> - WKTIRVWE | 1409                    | RWY-16loop-<br>WWE |
| 17  | C4 | 22  | RWITVRIW - (G <sub>3</sub> GKK) <sub>3</sub> GG <sub>3</sub> - WKTIRVWE | NMR data not available. |                    |
| 18  | C4 | 28  | RWITVRIW - (G <sub>3</sub> GKK) <sub>4</sub> GG <sub>3</sub> - WKTIRVWE | NMR data not available. |                    |

### Fraction Folded Calculation ( $\chi_F$ )

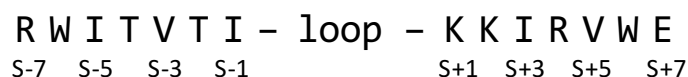

Fraction folded populations were calculated using an average of CSDs from backbone H $\alpha$ s S-6, S-4, S+4 and H $\text{N}$ s S-5, S-3, S+3, S+5 with additional probes from the sidechain of the Tryptophan in the edge position, H $\beta$ 3, H $\zeta$ 3, and H $\epsilon$ 3 for each Trp/Trp aryl cluster. Additionally, systems B2 and B4 also include the diagnostic C-terminal Gly H $\text{N}$ .

**Figure S1.** Backbone H<sub>N</sub> CSDs of the peptides used as fully folded baselines, at 280-320K. Little to no melting is observed upon heating.

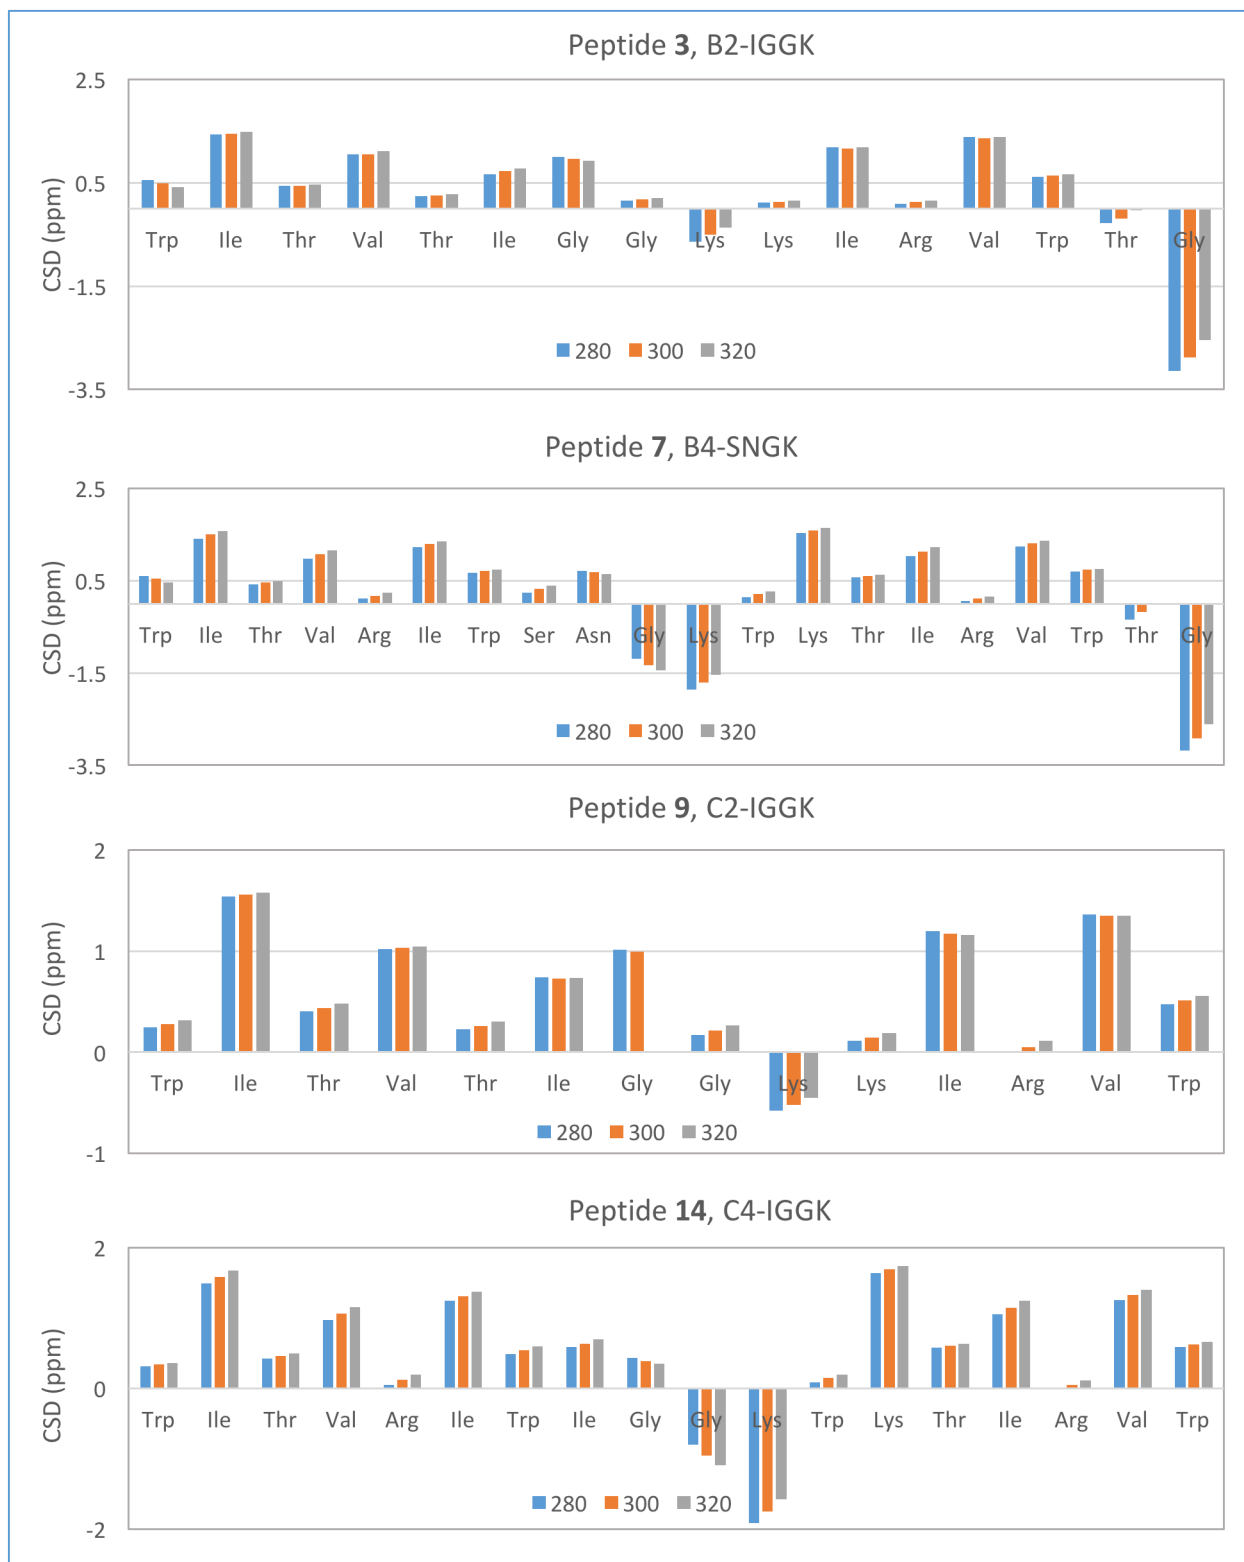

**Figure S2.** RWITVRIW<sup>Flank</sup> – Loop – WKTIRVW<sup>Cap</sup>E Comparison of the position specific fraction folded of the termini and residues near the loop.

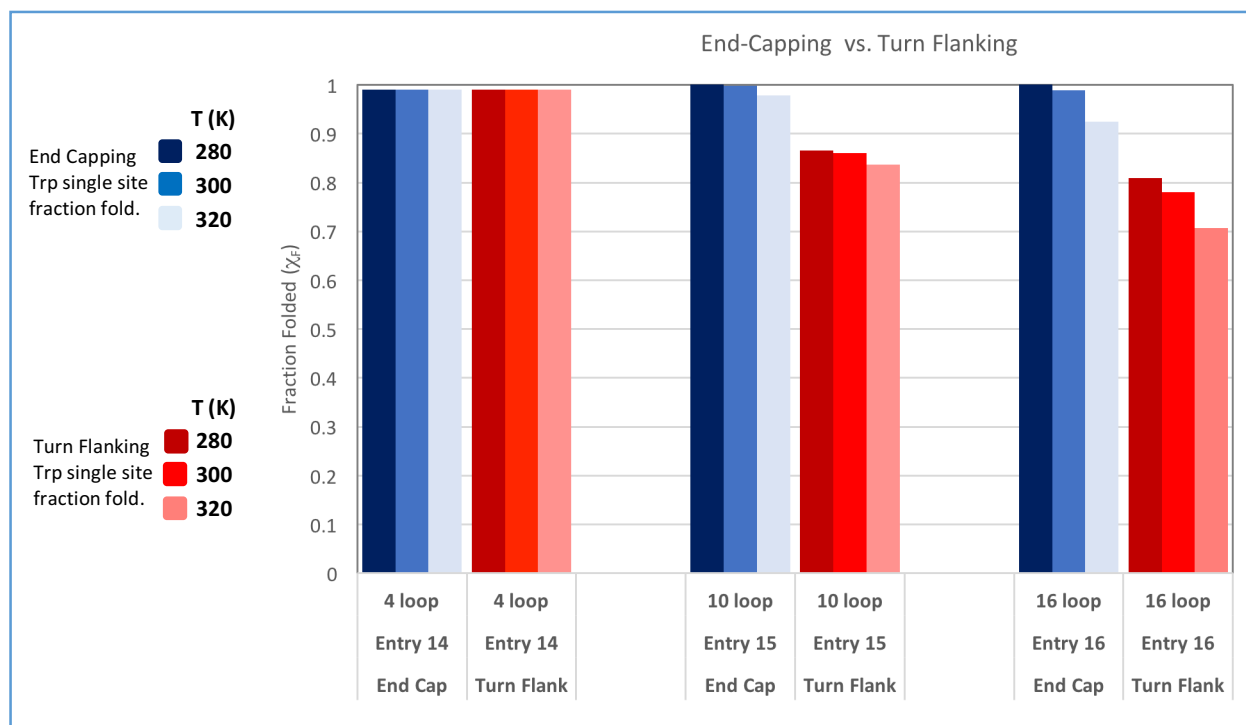

**Figure S3.** CD spectra was taken from 6.25-100  $\mu$ M to verify the exciton couplet observed is from a monomeric species. (A) Raw CD spectra. (B) Signal at 228 nm vs. Peptide concentration.

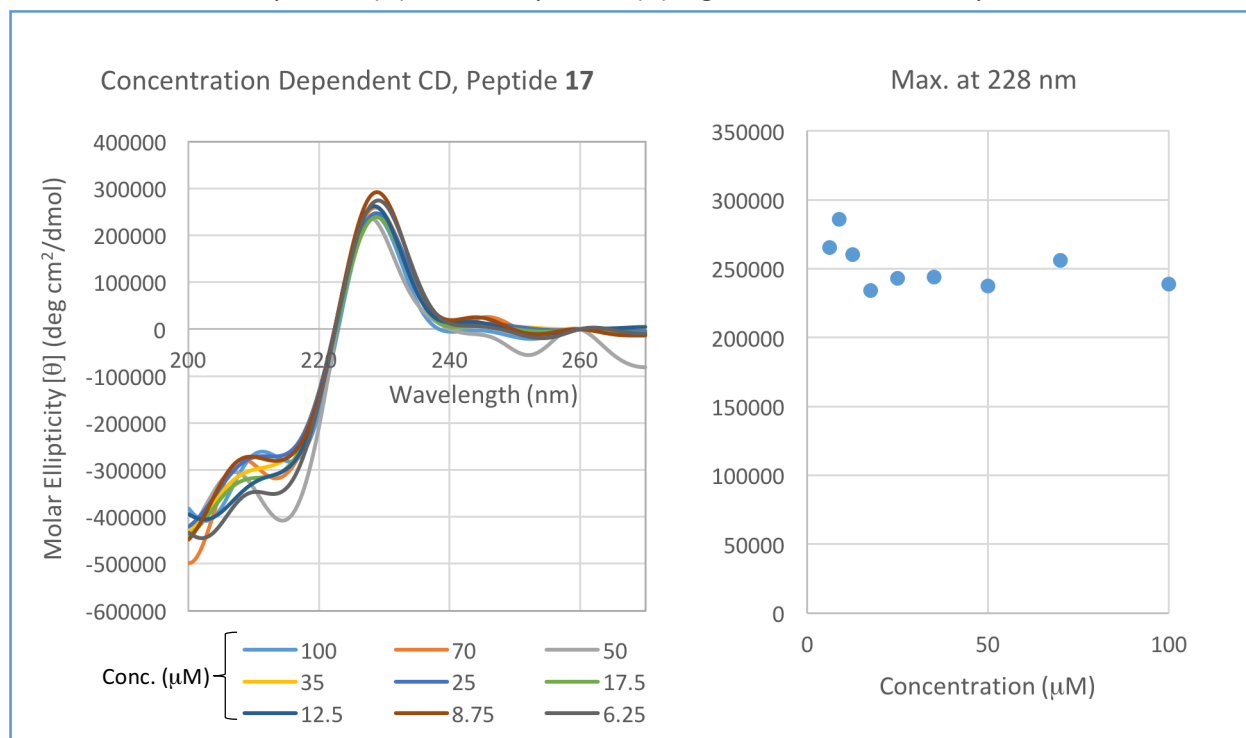

**Figure S4.** Concentration dependent NMR spectra of Peptide **17** (system C4-22 loop): NMR spectra of the aromatic and amide H<sub>N</sub> region, taken at 30 (red) and 700 μM (blue). Peak position and broadening appear similar. The broadening seen, particularly at highly shifted resonances, is due to slow exchange between the folded and unfolded states.

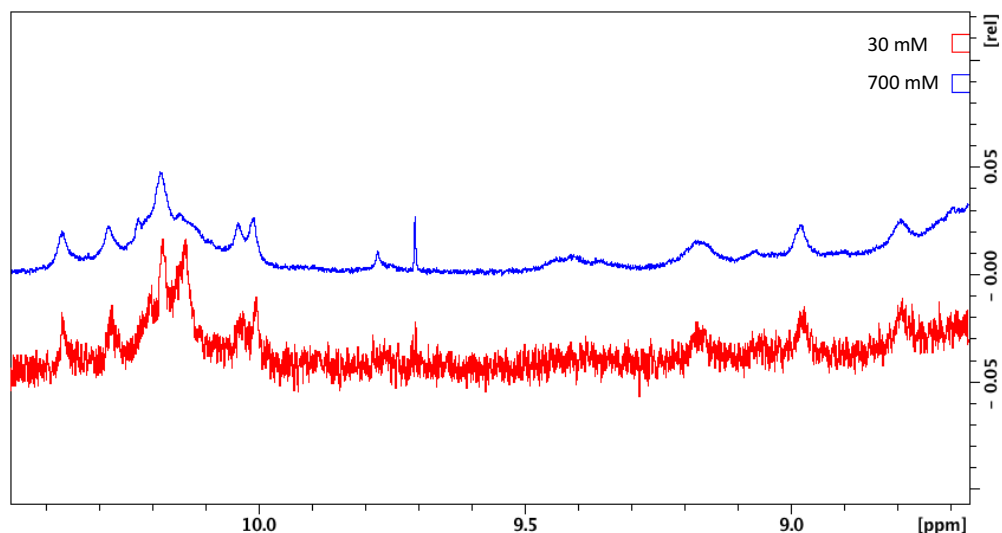

**Figure S5.** CSDs of the diagnostic probes within the added turn-region (H<sub>N</sub> of Ile and Lys in the turn, underlined in each sequence) of different length loops.

Peptide **24**: RWITVTI-GlpGKG-KKIRVWE

Peptide **27**: RWITVTI-GGGlpGKGGG-KKIRVWE

Peptide **29**: RWITVTI-GGGGGGlpGKGGGGGG-KKIRVWE

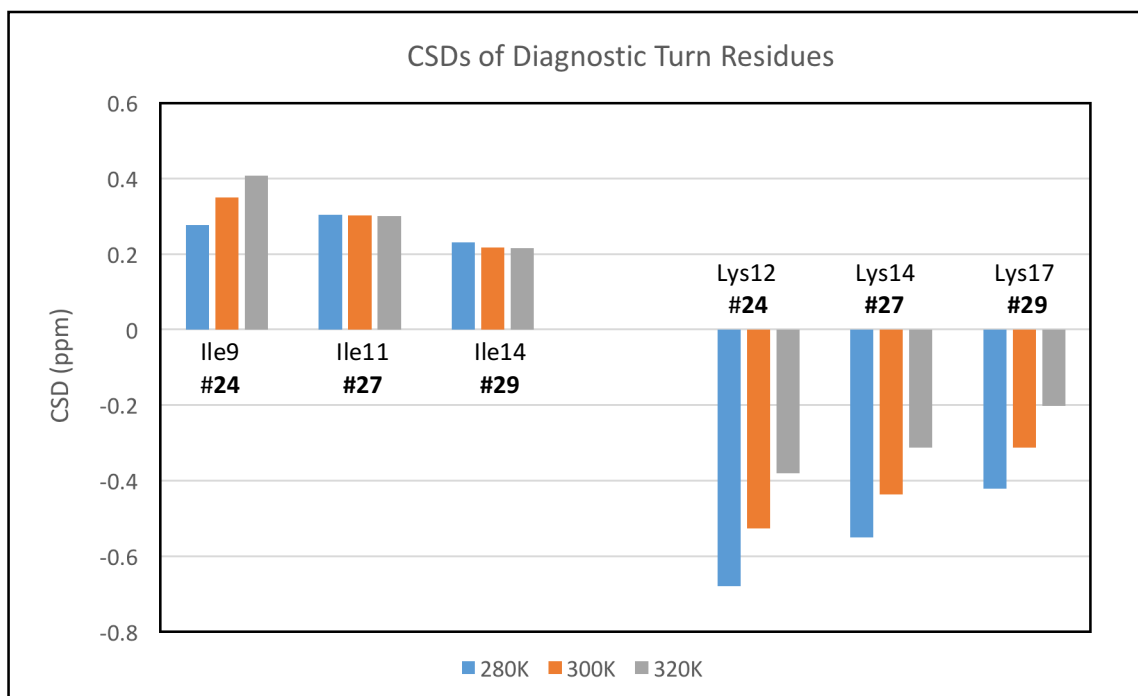

## References

- (1) Fesinmeyer, R. M., Hudson, F. M., and Andersen, N. H. (2004) Enhanced Hairpin Stability through Loop Design: The Case of the Protein G B1 Hairpin. *J. Am. Chem. Soc.* *126*, 7238–7243.
- (2) Andersen, N. H., Cao, B., and Chen, C. (1992) Peptide/Protein Structure Analysis Using the Chemical Shift Index Method: Upfield  $\alpha$ -CH Values Reveal Dynamic Helices and  $\alpha_L$  Sites. *Biochem. Biophys. Res. Commun.* *184*, 1008–1014.
- (3) Andersen, N. H., and Tong, H. (1997) Empirical parameterization of a model for predicting peptide helix/coil equilibrium populations. *Protein Sci.* *6*, 1920–1936.
- (4) Eidenschink, L., Kier, B. L., Huggins, K. N. L., and Andersen, N. H. (2009) Very short peptides with stable folds: Building on the interrelationship of Trp/Trp, Trp/cation, and Trp/backbone-amide interaction geometries. *Proteins Struct. Funct. Bioinforma.* *75*, 308–322.
